# Supplementary material
Source: HighWire-hosted journal article supplement (https://bmjopen.bmj.com/content/11/12/e049799)
Supplement: inline-supplementary-material-2 [file inline-supplementary-material-2.pdf]

**Table S1.** Statistical measures of prognostic performance of Doppler ultrasound reported in the selected studies

| Prognostic determinant | Outcome         | Studies               | Sn    | Sp    | PPV   | NPV   | AUROC | Diagnostic accuracy | OR [95% CI] | RR [95% CI] | Correlation | Normal Doppler n (%) | Abnormal Doppler n (%) |            |
|------------------------|-----------------|-----------------------|-------|-------|-------|-------|-------|---------------------|-------------|-------------|-------------|----------------------|------------------------|------------|
| UA flow impedance      | FGR             | Agbaje et al., 2018   | 67.00 | 53.00 |       |       | 0.63  |                     |             |             |             |                      |                        |            |
|                        |                 | Mullick et al., 1993  | 85.00 | 89.00 | 88.50 |       |       |                     |             |             |             |                      |                        |            |
|                        |                 | Najam et al., 2016    | 48.15 | 80.67 | 53.06 | 77.40 |       |                     |             |             |             |                      |                        |            |
|                        |                 | Rocca et al., 1995    | 92.30 | 91.90 | 77.40 | 97.60 |       | 92.0                |             |             |             |                      |                        |            |
|                        |                 | Khanduri et al., 2013 | 73.80 | 75.90 | 87.70 | 55.40 |       | 75.00               |             |             |             |                      |                        |            |
|                        |                 | Bano et al., 2010     | 46.70 | 93.30 | 87.50 | 63.60 |       | 70.00               |             |             |             |                      |                        |            |
|                        |                 | Nagar et al., 2015    | 42.86 | 94.62 | 37.50 | 95.65 |       |                     |             |             |             |                      |                        |            |
|                        | NICU Admission  | Anshul et al., 2010   |       |       |       |       |       |                     |             |             |             |                      | 13 (24.07)             | 36 (78.2)  |
|                        |                 | Najam et al., 2016    | 50.00 | 80.30 | 48.90 | 80.95 |       |                     |             |             |             |                      |                        |            |
|                        | Fetal Distress  | Anshul et al., 2010   |       |       |       |       |       |                     |             |             |             |                      | 18 (33)                | 35 (76)    |
|                        |                 | Rocca et al., 1995    |       |       |       |       |       |                     |             |             |             |                      | 2 (2.5)                | 12 (39)    |
|                        |                 | Najam et al., 2016    | 66.67 | 78.04 | 74.89 | 89.72 |       |                     |             |             |             |                      |                        |            |
|                        |                 | Yelikar et al., 2013  | 42.10 | 65.90 | 12.10 | 91.10 |       |                     |             |             |             |                      |                        |            |
|                        | Stillbirth      | Anshul et al., 2010   |       |       |       |       |       |                     |             |             |             |                      | 0 (0)                  | 4 (9.5)    |
|                        |                 | Najam et al., 2016    |       |       |       |       |       |                     |             |             |             |                      | 0 (0)                  | 5 (8.2)    |
|                        | Perinatal death | Rocca et al., 1995    |       |       |       |       |       |                     |             |             |             |                      | 0 (0)                  | 2 (6.5)    |
|                        |                 | Anshul et al., 2010   |       |       |       |       |       |                     |             |             |             |                      | 0 (0)                  | 9 (60)     |
|                        | LBW             | Anshul et al., 2010   |       |       |       |       |       |                     |             |             |             |                      | 15 (27.0)              | 35 (77.8)  |
|                        | Apgar Score     | Rocca et al., 1995    | 80.00 | 82.40 | 41.00 | 96.00 |       | 83.00               |             |             |             |                      |                        |            |
|                        |                 | Anshul et al., 2010   |       |       |       |       |       |                     |             |             |             |                      | 2 (3.7)                | 14 (82.35) |
|                        |                 | Najam et al., 2016    |       |       |       |       |       |                     |             |             |             |                      | 3 (60.0)               | 6 (85.71)  |
|                        |                 | Agbaje et al., 2018   |       |       |       |       |       |                     |             |             | 0.378       |                      |                        |            |
|                        | Fetal Anemia    | Kumari et al., 2019   |       |       |       |       |       |                     |             |             | 0.21        |                      |                        |            |
|                        | HIE             | Najam et al., 2016    |       |       |       |       |       |                     |             |             |             |                      | 1 (1.29)               | 8 (16.31)  |
|                        | MAS             | Najam et al., 2016    |       |       |       |       |       |                     |             |             |             |                      | 1 (1.29)               | 16 (32.65) |
|                        | CAPO            | Bano et al., 2010     | 79.20 | 92.40 | 79.20 | 92.20 |       | 88.90               |             |             |             |                      |                        |            |
|                        |                 | Lakhkar et al 2006    | 50.00 | 59.00 | 66.60 | 41.90 |       |                     |             |             |             |                      |                        |            |

|                           |                   |                        |        |        |       |       |      |       |                 |  |          |           |            |
|---------------------------|-------------------|------------------------|--------|--------|-------|-------|------|-------|-----------------|--|----------|-----------|------------|
|                           |                   | Rani et al., 2016      | 17.80  | 95.80  | 80.70 | 50.50 | 0.57 |       |                 |  |          |           |            |
|                           |                   | Geerts et al., 2007    | 75.00  |        |       | 95.00 |      |       | 0.6 (0.1, 4.1)  |  |          |           |            |
|                           |                   | Malik et al., 2013     | 64.40  | 80.00  | 96.60 | 20.00 |      |       |                 |  |          |           |            |
|                           |                   | Pattinson et al., 1993 | 12.50  | 91.80  | 22.70 | 84.50 |      |       |                 |  |          |           |            |
|                           |                   | Ebrashy et al., 2005   | 53.30  | 36.40  | 81.10 | 30.80 |      |       |                 |  |          |           |            |
|                           |                   | Waa et al., 2010       | 8.00   | 100.00 | 0.00  | 26.00 |      |       |                 |  |          |           |            |
| <b>UA AREDF</b>           | Perinatal death   | Lakshmi et al., 2013   |        |        |       |       |      |       | 9.8 (2.1, 46.4) |  |          |           |            |
|                           |                   | Najam et al., 2016     |        |        |       |       |      |       |                 |  | 2 (2.59) | 4 (33.33) |            |
|                           | RDS               | Lakshmi et al., 2013   |        |        |       |       |      |       | 2.4 (1.1, 5.0)  |  |          |           |            |
|                           | CAPO              | Pattinson et al., 1991 | 75.00  | 90.00  | 69.00 |       |      |       |                 |  |          |           |            |
| Lakshmi et al., 2013      |                   |                        |        |        |       |       |      |       | 8.4 (2.3, 30.5) |  |          |           |            |
| <b>MCA flow impedance</b> | FGR               | Najam et al., 2016     | 59.25  | 88.89  | 72.72 | 81.35 |      |       |                 |  |          |           |            |
|                           |                   | Bano et al., 2010      | 8.90   | 100.0  | 100.0 | 52.30 |      | 54.40 |                 |  |          |           |            |
|                           |                   | Khanduri et al., 2013  | 26.20  | 92.60  | 89.20 | 35.00 |      | 46.10 |                 |  |          |           |            |
|                           | Fetal Anemia      | Pares et al., 2008     | 100.00 | 65.00  | 90.90 | 100.0 |      | 92.20 |                 |  |          |           |            |
|                           |                   | Kumari et al., 2019    | 68.00  | 57.00  | 83.00 | 33.00 | 0.70 |       |                 |  | -0.43    |           |            |
|                           | NICU Admission    | Najam et al., 2016     | 64.58  | 88.69  | 70.45 | 85.71 |      |       |                 |  |          |           |            |
|                           | Neonatal Acidosis | Allam et al., 2013     | 87.50  | 64.00  | 74.00 | 82.00 | 0.82 |       |                 |  |          |           |            |
|                           | Fetal Distress    | Najam et al., 2016     | 72.73  | 78.05  | 54.55 | 91.53 |      |       |                 |  |          |           |            |
|                           | Stillbirth        | Najam et al., 2016     |        |        |       |       |      |       |                 |  |          | 0 (0)     | 2 (4.5)    |
|                           | Apgar Score       | Najam et al., 2016     |        |        |       |       |      |       |                 |  |          | 1 (1.29)  | 17 (38.6)  |
|                           | HIE               | Najam et al., 2016     |        |        |       |       |      |       |                 |  |          | 1 (1.29)  | 10 (22.72) |
|                           | MAS               | Najam et al., 2016     |        |        |       |       |      |       |                 |  |          | 1 (1.29)  | 20 (45.5)  |
|                           | CAPO              | Bano et al., 2010      | 16.70  | 100.0  | 100.0 | 76.70 |      | 77.80 |                 |  |          |           |            |
|                           |                   | Lakhkar et al 2006     | 41.60  | 90.90  | 88.20 | 48.70 |      |       |                 |  |          |           |            |
| Rani et al., 2016         |                   | 18.60                  | 90.30  | 68.70  | 49.40 | 0.58  |      |       |                 |  |          |           |            |
| Dhand et al., 2011        |                   | 71.00                  | 92.00  | 94.00  | 65.00 |       |      |       |                 |  |          |           |            |
| Malik et al., 2013        |                   | 7.70                   | 90.00  | 87.50  | 9.80  |       |      |       |                 |  |          |           |            |
| Ebrashy et al., 2005      |                   | 41.00                  | 63.60  | 80.00  | 23.30 |       |      |       |                 |  |          |           |            |
| Waa et al., 2010          |                   | 23.0                   | 68.00  | 76.00  | 33.00 |       |      |       |                 |  |          |           |            |

|                     |                   |                      |        |       |        |       |  |                 |                 |                 |  |          |            |  |
|---------------------|-------------------|----------------------|--------|-------|--------|-------|--|-----------------|-----------------|-----------------|--|----------|------------|--|
| CPR                 | FGR               | Najam et al., 2016   | 85.10  | 89.72 | 80.70  | 92.30 |  |                 |                 |                 |  |          |            |  |
|                     |                   | Bano et al., 2010    |        |       |        |       |  | 72.20           |                 |                 |  |          |            |  |
|                     | NICU Admission    | Najam et al., 2016   | 75.00  | 82.92 | 63.15  | 89.47 |  |                 |                 |                 |  |          |            |  |
|                     |                   | Alanwar et al., 2018 | 62.50  | 71.42 | 29.40  | 90.90 |  |                 |                 |                 |  |          |            |  |
|                     | Foetal Distress   | Najam et al., 2016   | 90.91  | 78.04 | 52.63  | 96.97 |  |                 |                 |                 |  |          |            |  |
|                     |                   | Masihi et al.2019    | 80.95  | 50.00 | 17.50  | 95.20 |  |                 |                 |                 |  |          |            |  |
|                     | Stillbirth        | Najam et al., 2016   |        |       |        |       |  |                 |                 |                 |  | 0 (0)    | 4 (7.14)   |  |
|                     | Apgar Score       | Najam et al., 2016   |        |       |        |       |  |                 |                 |                 |  | 1 (1.29) | 19 (33.33) |  |
|                     |                   | Alanwar et al., 2018 | 50.0   | 88.10 | 44.40  | 90.20 |  |                 |                 |                 |  |          |            |  |
|                     | Neonatal Acidosis | Ebrashy et al., 2005 | 64.10  | 72.70 | 89.30  | 36.40 |  |                 |                 | 1.4 (1.2, 1.7)  |  |          |            |  |
|                     |                   | Alanwar et al., 2018 | 43.75  | 69.05 | 21.21  | 86.57 |  |                 |                 |                 |  |          |            |  |
|                     | HIE               | Najam et al., 2016   |        |       |        |       |  |                 |                 |                 |  | 1 (1.29) | 12 (21.05) |  |
|                     | MAS               | Najam et al., 2016   | 96.15  |       |        | 99.20 |  |                 |                 |                 |  | 1 (1.29) | 25 (43.85) |  |
|                     | CAPO              | Bano et al., 2010    | 83.30  | 100.0 | 100.00 | 94.30 |  | 95.60           |                 |                 |  |          |            |  |
| Lakhkar et al 2006  |                   | 47.20                | 86.30  | 85.00 | 50.00  |       |  |                 |                 |                 |  |          |            |  |
| Rani et al., 2016   |                   | 7.60                 | 98.00  | 81.80 | 48.30  | 0.60  |  |                 |                 |                 |  |          |            |  |
| Malik et al., 2013  |                   | 68.80                | 100.00 | 100.0 | 26.30  |       |  |                 |                 |                 |  |          |            |  |
| Geerts et al., 2007 |                   |                      |        | 57.0  |        |       |  | 1.1 (0.1, 14.6) |                 |                 |  |          |            |  |
| UtA flow impedance  | FGR               | Verma et al., 2016   | 45.0   | 84.10 | 28.10  | 91.70 |  |                 |                 |                 |  |          |            |  |
|                     |                   | Phupong et al., 2003 | 67.0   | 82.90 | 6.90   | 99.20 |  |                 |                 | 9.1 (1.7, 48.5) |  |          |            |  |
|                     |                   | Nagar et al., 2015   | 25.0   | 94.56 | 28.57  | 93.55 |  |                 |                 |                 |  |          |            |  |
|                     | Perinatal Death   | Dorman et al., 2002  |        |       |        |       |  |                 |                 | 2.37 (1.3, 4.3) |  |          |            |  |
|                     | LBW               | Verma et al., 2016   | 45.40  | 84.60 | 31.30  | 90.90 |  |                 |                 |                 |  |          |            |  |
|                     |                   | Dorman et al., 2002  |        |       |        |       |  |                 |                 | 2.52 (1.5, 4.2) |  |          |            |  |
|                     | Preterm Birth     | Verma et al., 2016   | 57.10  | 63.20 | 18.50  | 91.00 |  |                 |                 |                 |  |          |            |  |
| Dorman et al., 2002 |                   |                      |        |       |        |       |  |                 | 1.53 (0.9, 2.4) |                 |  |          |            |  |

|                    |                   |                     |       |       |       |       |      |       |                 |  |       |  |  |  |
|--------------------|-------------------|---------------------|-------|-------|-------|-------|------|-------|-----------------|--|-------|--|--|--|
|                    | CAPO              | Verma et al., 2016  | 48.20 | 95.40 | 84.40 | 78.20 |      |       |                 |  |       |  |  |  |
|                    |                   | Nouh et al., 2011   | 84.60 | 96.30 | 91.70 | 92.90 |      |       |                 |  |       |  |  |  |
|                    |                   | Malik et al., 2013  | 37.70 | 70.00 | 91.80 | 11.00 |      |       |                 |  |       |  |  |  |
|                    |                   | Zarean et al., 2018 | 37.50 | 73.30 | 48.40 | 63.70 | 0.55 |       |                 |  |       |  |  |  |
| FDA flow impedance | Fetal anemia      | Pares et al., 2008  | 95.70 | 100.0 | 100.0 | 86.90 |      | 96.70 |                 |  |       |  |  |  |
|                    |                   | Kumari et al., 2019 | 87.00 | 57.00 |       |       | 0.80 |       |                 |  | -0.54 |  |  |  |
|                    | CAPO              | Lakhkar et al 2006  | 44.40 | 59.00 | 64.00 | 56.50 |      |       |                 |  |       |  |  |  |
| FDA & MCA          | Fetal anemia      | Pares et al., 2008  | 98.40 | 100.0 | 100.0 | 91.70 |      | 98.60 |                 |  |       |  |  |  |
|                    |                   | Kumari et al., 2019 | 86.00 | 67.00 | 86.00 | 67.00 |      |       |                 |  |       |  |  |  |
| DV flow impedance  | Neonatal Acidosis | Allam et al., 2013  | 100.0 | 57.00 | 72.0  | 100.0 | 0.88 | 80.00 |                 |  |       |  |  |  |
|                    | CAPO              | Geerts et al., 2007 |       | 92.0  | 33.0  |       |      |       | 0.3 (0.03, 4.6) |  |       |  |  |  |

<sup>a</sup>UA: umbilical artery; MCA: middle cerebral artery; CPR: cerebroplacental ratio; UtA: uterine artery; FDA: fetal descending aorta; DV: ductus venosus; RI: resistive index; PI: pulsatility index; S/D ratio: systolic diastolic ratio; PSV: peak systolic velocity; MV: mean velocity; AREDF: absent and/or reversed end diastolic flow; FGR: fetal growth restriction; LBW: low birth weight; HIE: hypoxic ischemic encephalopathy; MAS: meconium aspiration syndrome; RDS: respiratory distress syndrome; NICU: neonatal intensive care unit; CAPO: composite adverse perinatal outcomes; Sn: sensitivity; Sp: specificity; PPV: positive predictive value; NPV: negative predictive value; OR: odds ratio; RR: relative risk; and n (%): frequency (percentage).
