# Supplementary material
Source: HighWire-hosted journal article supplement (https://bmjopen.bmj.com/content/11/12/e049799)
Supplement: inline-supplementary-material-4 [file inline-supplementary-material-4.pdf]

**Appendix S3.** The aims of the selected studies and risk profiles of the women recruited

| First Author          | Aim of study                                                                                                                                                                                                                                                                                                  | Dating method                       | Risk Profile | Participant risk profile details in the article                                                                                                                                                                                                                                                                                                                                                                                |
|-----------------------|---------------------------------------------------------------------------------------------------------------------------------------------------------------------------------------------------------------------------------------------------------------------------------------------------------------|-------------------------------------|--------------|--------------------------------------------------------------------------------------------------------------------------------------------------------------------------------------------------------------------------------------------------------------------------------------------------------------------------------------------------------------------------------------------------------------------------------|
| Abdallah et al., 2019 | To study the value of umbilical artery Doppler indices in predicting the risk of intrapartum and neonatal outcomes in pregnancies with and without nuchal cord.                                                                                                                                               | LMP or first trimester ultrasound   | Low risk     | Primigravida $\geq 37$ weeks admitted in labor to the delivery unit. Women with BMI $>30$ kg/m <sup>2</sup> , multiple pregnancy, fetal malpresentation, fetal demise, chorioamnionitis, meconium-stained liquor, associated medical disorder (hypertension, diabetes, autoimmune disease, etc.), perinatal complication (e.g. placental abruption), fetal malformation or abnormal fetal growth were excluded from the study. |
| Agbaje et al., 2018   | To assess umbilical artery Doppler findings in women with sickle cell anemia in the local environment at the onset of the third trimester and compare with obstetric outcomes.                                                                                                                                | LMP and/or early dating sonograms   | High-risk    | Sickle cell anemia.                                                                                                                                                                                                                                                                                                                                                                                                            |
| Alanwar et al., 2018  | To assess the efficacy of fetal middle cerebral artery/umbilical artery pulsatility index ratio (cerebroplacental ratio CPR) in predicting the occurrence of adverse perinatal outcomes in pregnancies complicated with severe pre-eclampsia.                                                                 | Not specified                       | High-risk    | Pregnancies complicated with severe pre-eclampsia.                                                                                                                                                                                                                                                                                                                                                                             |
| Allam et al., 2013    | To investigate, in high-risk pregnancies, the prediction of neonatal acidosis using DV, MCA and UA Doppler studies and subsequently to determine the best parameters and cutoff values.                                                                                                                       | Not specified                       | High-risk    | Suspected IUGR, oligohydramnios, preeclampsia, or placental vascular dysfunction documented by abnormal umbilical artery pulsatility index by local reference ranges.                                                                                                                                                                                                                                                          |
| Anshul et al., 2010   | To evaluate the role of umbilical artery Doppler in growth-restricted fetuses.                                                                                                                                                                                                                                | LMP and first trimester dating scan | High-risk    | SGA foetuses, some mothers had hypertensive disorder, anemia, bad obstetric history                                                                                                                                                                                                                                                                                                                                            |
| Bano et al., 2010     | To evaluate the usefulness of the pulsatility index (PI) of the umbilical artery (UA) and that of the middle cerebral artery (MCA), as well as the ratio of the MCA PI to the UA PI (C/U ratio), in the diagnosis of small-for-gestational-age (SGA) fetuses and the prediction of adverse perinatal outcome. | Not specified                       | High risk    | Clinical suspicion of FGR                                                                                                                                                                                                                                                                                                                                                                                                      |

|                       |                                                                                                                                                                                                                                                                                                                                                     |                                                                                      |           |                                                         |
|-----------------------|-----------------------------------------------------------------------------------------------------------------------------------------------------------------------------------------------------------------------------------------------------------------------------------------------------------------------------------------------------|--------------------------------------------------------------------------------------|-----------|---------------------------------------------------------|
| Dhand et al., 2011    | To compare the role of the middle cerebral artery and umbilical artery Doppler pulsatility indices in predicting the fetal outcome in intrauterine growth restriction.                                                                                                                                                                              | LMP and fetal biometry <22weeks                                                      | High risk | SGA fetuses                                             |
| Dorman et al., 2002   | To determine whether impaired uteroplacental blood flow might account for the low infant birth weight associated with maternal falciparum malaria infection.                                                                                                                                                                                        | LMP and fetal biometry                                                               | High-risk | Maternal falciparum malaria infection.                  |
| Ebrashy et al., 2005  | To evaluate the accuracy of middle cerebral/umbilical artery resistance index (C/U RI) ratio in predicting acidemia and low Apgar score at 5 minutes after birth in the infants of women with preeclampsia.                                                                                                                                         | Fetal biometry (BPD, AC and FL)                                                      | High-risk | Pre-eclampsia women                                     |
| Geerts et al., 2007   | To assess the prognostic value of ultrasound findings and fetoplacental Doppler indices in severe preterm preeclampsia in identifying fetuses at high risk of death, major morbidity or long-term compromise.                                                                                                                                       | LMP and fetal biometry                                                               | High-risk | Women with severe pre-eclampsia                         |
| Khanduri et al., 2013 | To measure the pulsatility index (PI) and resistive index (RI) of the middle cerebral artery (MCA) and umbilical artery (UA) in predicting fetal growth restriction.                                                                                                                                                                                | LMP and first or second trimester ultrasound                                         | High-risk | Clinical suspicion of FGR                               |
| Kumari et al., 2019   | To assess the correlation between fetal blood vessel Doppler measurements and fetal anemia among Rhesus isoimmunized pregnancies after two intrauterine transfusions as a potential guide to therapy.                                                                                                                                               | Not specified                                                                        | High risk | Rhesus isoimmunized complicated pregnancies             |
| Lakhkar et al., 2006  | To determine and compare the diagnostic performance of Doppler sonography of fetal middle cerebral artery (MCA), descending abdominal aorta (DAA), umbilical artery (UA), umbilical vein (UV) and inferior vena cava (IVC) for prediction of adverse perinatal outcome in suspected intrauterine growth retardation (IUGR) and pre-eclampsia (PET). | LMP, clinical gestational age, 1 <sup>st</sup> or 2 <sup>nd</sup> trimester biometry | High risk | Preeclampsia and suspicion of growth-restricted fetuses |

|                      |                                                                                                                                                                                                                                                                                                                                                                                |                                    |                   |                                                                                                                                                                                                                                                                                                                                                                        |
|----------------------|--------------------------------------------------------------------------------------------------------------------------------------------------------------------------------------------------------------------------------------------------------------------------------------------------------------------------------------------------------------------------------|------------------------------------|-------------------|------------------------------------------------------------------------------------------------------------------------------------------------------------------------------------------------------------------------------------------------------------------------------------------------------------------------------------------------------------------------|
| Lakshmi et al., 2013 | To determine outcomes of preterm infants with history of absent/reversed end-diastolic umbilical artery Doppler flow (AREDF) vs. infants with forward end-diastolic flow (FEDF).                                                                                                                                                                                               | LMP or first trimester ultrasound  | High-risk         | FGR, pregnancy induced hypertension, h/o previous intrauterine death                                                                                                                                                                                                                                                                                                   |
| Malik et al., 2013   | To determine the role of ultrasonography in screening high-risk mothers for detection of IUGR, to find out the impact of fetal parameters on the extent of IUGR, correlation between the sonographic pattern of IUGR and the birth weight, and to find out the sensitivities of various fetal parameters and their evaluation against each other and against the birth weight. | LMP                                | High-risk         | FGR; hypertensive disorder; pre-eclampsia                                                                                                                                                                                                                                                                                                                              |
| Masihi et al. 2019   | To determine the relationship between the fetal middle cerebral artery and the umbilical artery ratio on color Doppler sonography with fetal distress at 38-40 weeks of gestation.                                                                                                                                                                                             | First trimester ultrasound         | Low risk          | Women that had uncomplicated pregnancies                                                                                                                                                                                                                                                                                                                               |
| Mullick et al., 1993 | To explore whether measurement of umbilical artery blood velocity waveform between 22 and 26 weeks might predict pregnancies destined to become complicated by pregnancy induced hypertension (PIH) and/or fetal growth restriction (IUGR).                                                                                                                                    | Not specified                      | Low and high-risk | Women attending routine antenatal (any risk profile).                                                                                                                                                                                                                                                                                                                  |
| Nagar et al., 2015   | To evaluate the predictive values of Uterine and Umbilical artery Doppler indices in high-risk pregnancies.                                                                                                                                                                                                                                                                    | LMP and ultrasound before 21 weeks | High risk         | History of preeclampsia or eclampsia in previous pregnancy pre-existing medical disorders like: Diabetes, Renal disease, Epilepsy, Autoimmune disease, Thrombophilia, and Hypertension, History of IUGR or still birth, history of abruptio placentae, preeclampsia or pregnancy-induced hypertension current, Nulliparity, Extremes of age (<20 years and >35 years). |

|                        |                                                                                                                                                                                                                                                                            |                                     |                   |                                                                                      |
|------------------------|----------------------------------------------------------------------------------------------------------------------------------------------------------------------------------------------------------------------------------------------------------------------------|-------------------------------------|-------------------|--------------------------------------------------------------------------------------|
| Najam et al., 2016     | To assess the predictive value of the cerebroplacental ratio in the detection of perinatal outcome in high-risk pregnancies in comparison to its components.                                                                                                               | Not specified                       | Low and high-risk | Pregnancies undergoing routine antenatal (any risk profile).                         |
| Nouh et al., 2011      | To assess the value of uterine artery Doppler screening during pregnancy in predicting adverse pregnancy outcomes in women with polycystic ovary syndrome (PCOS).                                                                                                          | LMP and first trimester ultrasound  | High-risk         | Primigravida with ovulatory polycystic ovary syndrome (PCOS)                         |
| Pares et al., 2008     | To evaluate the accuracy of middle cerebral artery peak systolic velocity (MCA-PSV) associated with descending thoracic aorta mean velocity (DTA-MV) in the prediction of fetal anemia.                                                                                    | Sonographic exam at $\leq 20$ weeks | High-risk         | Fetuses at risk for anemia because of maternal alloimmunization to red-cell antigens |
| Pattinson et al., 1991 | To investigate whether abnormalities in Doppler waveform can predict the outcome of pregnancy accurately before other clinical signs develop                                                                                                                               | LMP and biometry: 16-20 weeks       | High risk         | SGA, preeclampsia and pregnancy wastage                                              |
| Pattinson et al., 1993 | To describe the prevalence and natural history of absent end-diastolic velocities (AEDV) in the umbilical artery of the fetus between 16 and 24 weeks gestation, and to evaluate its role as a screening test for identifying high-risk pregnancies.                       | Not specified                       | Low and high-risk | Pregnancies undergoing routine antenatal (any risk profile).                         |
| Phupong et al., 2003   | To assess the value of uterine artery notching as a screening test for preeclampsia and fetal growth restriction in a low-risk population of healthy pregnant women.                                                                                                       | LMP and first trimester ultrasound  | Low-risk          | Healthy pregnant women                                                               |
| Rani et al., 2016      | To assess the accuracy of the middle cerebral artery (MCA) and umbilical artery (UmA), pulsatility index (PI) and resistance index (RI) in predicting perinatal outcome in pregnancies complicated by preeclampsia with or without intrauterine growth restriction (IUGR). | Not specified                       | Low and high-risk | Women attending routine antenatal (any risk profile).                                |

|                      |                                                                                                                                                      |               |                   |                                                        |
|----------------------|------------------------------------------------------------------------------------------------------------------------------------------------------|---------------|-------------------|--------------------------------------------------------|
| Rocca et al., 1995   | To test the value of routine Doppler study of the umbilical artery to predict the perinatal outcome in pre-eclamptic patients.                       | Not specified | High risk         | Pre-eclampsia women                                    |
| Verma et al., 2016   | To assess the predictive value of uterine artery Doppler imaging at 22-24 weeks of gestation for adverse pregnancy outcomes.                         | Not specified | Low-risk          | Women with uncomplicated pregnancies                   |
| Waa et al., 2010     | To assess the value of umbilical and middle cerebral artery doppler ultrasound values in predicting foetal outcome in high and low-risk pregnancies. | Not specified | Low and high-risk | Women undergoing routine antenatal (any risk profile). |
| Yelikar et al., 2013 | To study the efficacy of fetal Doppler and Non-Stress Test (NST) in predicting fetal compromise in preeclampsia and growth-restricted fetuses.       | Not specified | High-risk         | Preeclampsia and growth-restricted fetuses             |
| Zarean et al., 2018  | To assess the diagnostic value of UtA-PI in the prediction of the adverse perinatal outcome at 30–34 week's gestation.                               | Not specified | Low-risk          | Women that had uncomplicated pregnancies               |

\*FGR: fetal growth restriction; LBW: low birth weight; NICU: neonatal intensive care unit. High risk: pregnancies with any underlying condition that threatens the health or life of the mother or her foetus.

Any risk profile: unselected pregnancies (pregnancies undergoing routine antenatal). Low risk: Uncomplicated pregnancies or healthy pregnant women
